# Supplementary material for: Motion sensors achieved from a conducting polymer-metal Schottky contact
Source: Royal Society of Chemistry journal article supplement (doi:10.1039/c9ra00120d), 2019-01-01
Supplement: c9ra00120d1.pdf [file c9ra00120d1.pdf]

# Motion Sensors from Conducting Polymer–Metal Schottky Contact

Yang Zhou, Jian Fang, Yan Zhao, Hongxia Wang, Hua Zhou, Guilong Yan, Tong Lin\*

Institute for Frontier Materials, Deakin University, Geelong VIC 3216, Australia

(Corresponding Author's email: [tong.lin@deakin.edu.au](mailto:tong.lin@deakin.edu.au))

## Electronic Supplementary Information

(a)

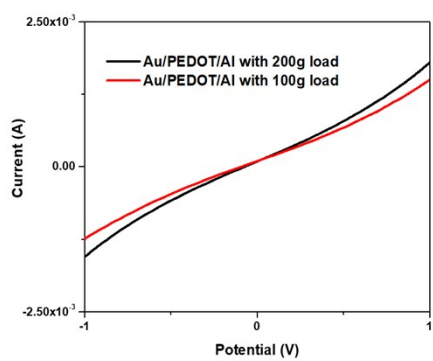

(b)

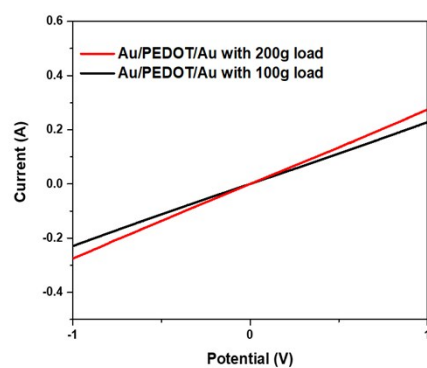

Figure S1: I–V plots for (a) Au/PEDOT/Al and (b) Au/PEDOT/Au devices with 100 and 200 grams load.

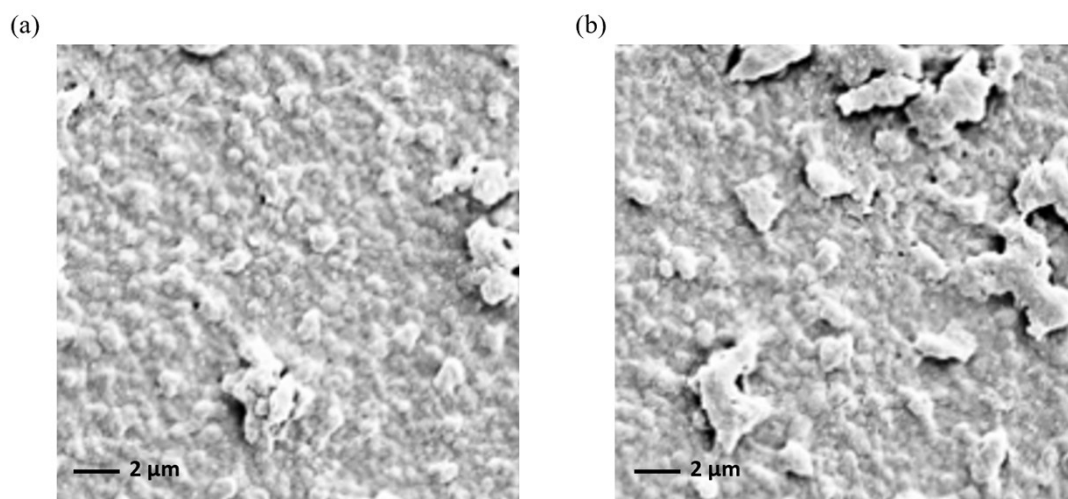

Figure S2. SEM images of two different locations on the same PEDOT film: (a) location A and (b) location B.

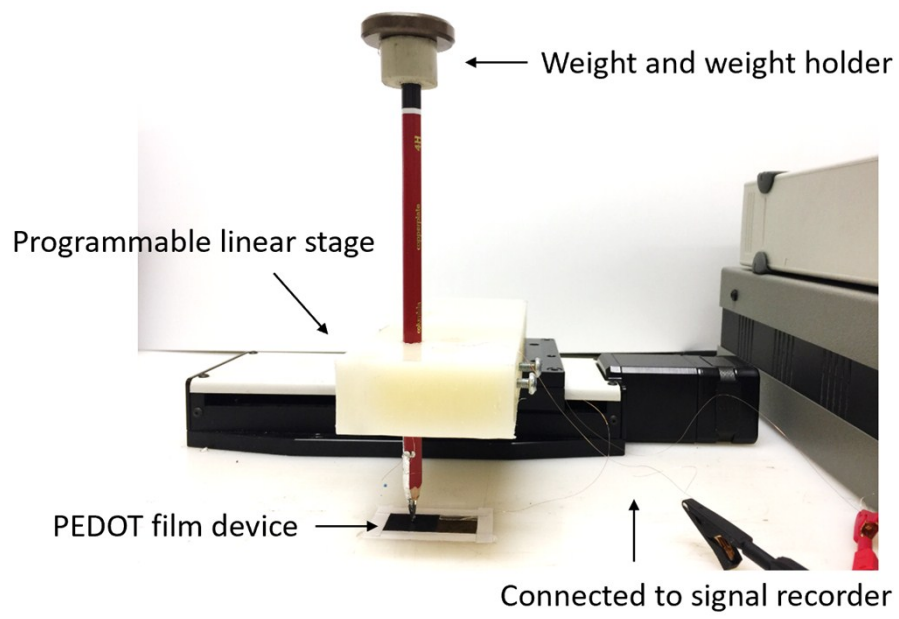

Figure S3. Digital photo of experiment setup.

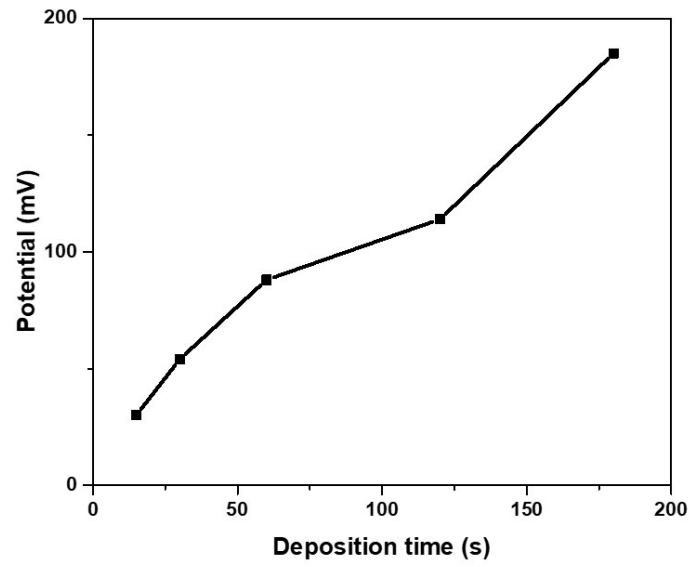

Figure S4. Output signals when Al rod attached onto PEDOT films with various deposition times at 8.0 kPa pressures.
